# Supplementary material for: Tuning of gel morphology with supramolecular chirality amplification using a solvent strategy based on an Fmoc-amino acid building block
Source: Royal Society of Chemistry journal article supplement (doi:10.1039/c6nj00092d), 2016-01-01
Supplement: c6nj00092d1.pdf [file c6nj00092d1.pdf]

Electronic Supporting Information  
**New Journal of Chemistry**

Tuning of gel morphology with supramolecular chirality amplification  
by solvent strategy based on an Fmoc-amino acid building block

Yimeng Zhang, Shangyang Li, Mingfang Ma, Minmin Yang, Yajie Wang, Aiyu Hao\* and  
Pengyao Xing

Key Laboratory of Colloid and Interface Chemistry of Ministry of Education, School of Chemistry  
and Chemical Engineering, Shandong University, Jinan 250100, P. R. China.  
E-mail: haoay@sdu.edu.cn; Fax: + 86 531 88564464; Tel: + 86 531 8836330

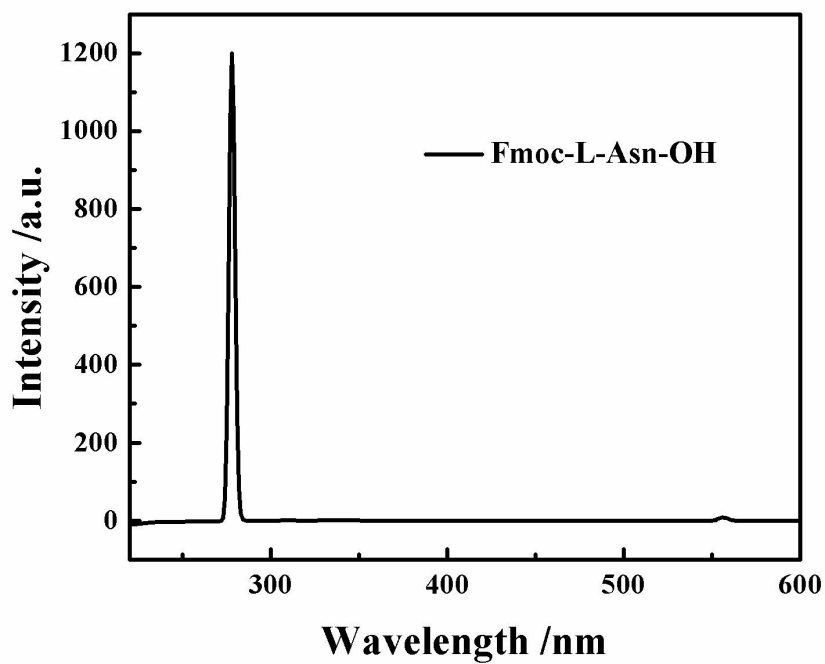

**Figure S1.** Fluorescence excitation spectra of Fmoc-L-Asn-OH in the solution state (DMSO),  $C_{FA}=1$  wt%; emission wavelength: 320 nm.

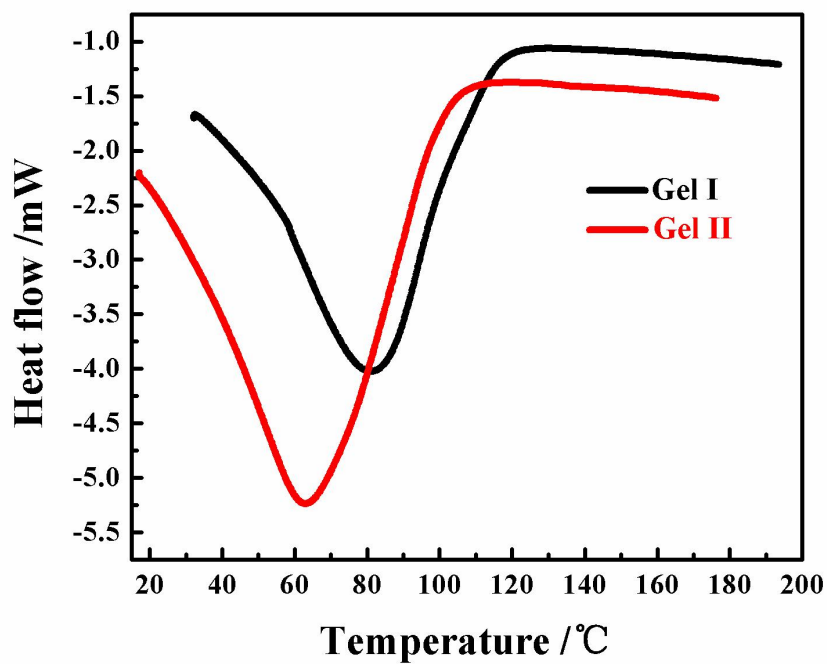

**Figure S2.** DSC curves of the two gel samples of Fmoc-L-Asn-OH.
